# Supplementary material for: Impact of COVID-19 Pandemic on Sleep Quality, Stress Level and Health-Related Quality of Life—A Large Prospective Cohort Study on Adult Danes
Source: MDPI journal article supplement (doi:10.3390/ijerph18147610), 2021-07-17
Supplement: s1 [file s1]

**Impact of COVID-19 pandemic on sleep quality, stress level and health-related quality of life – A large prospective cohort study on adult Danes**

Maria Didriksen<sup>1</sup>, Thomas Werge<sup>2,3,4</sup>, Janna Nissen<sup>1</sup>, Michael Schwinn<sup>1</sup>, Erik Sørensen<sup>1</sup>, Kasper R. Nielsen<sup>5</sup>, Mie T. Bruun<sup>6</sup>, Karina Banasik<sup>7</sup>, Thomas F. Hansen<sup>8</sup>, Christian Erikstrup<sup>9</sup>, Sisse R. Ostrowski<sup>1</sup>, Poul J. Jennum<sup>10,11</sup>, Henrik Hjalgrim<sup>12,13</sup>, Henrik Ullum<sup>10</sup>, Ole B. Pedersen<sup>14</sup>

<sup>1</sup>Department of Clinical Immunology, Copenhagen University Hospital, Rigshospitalet, Copenhagen, Denmark

<sup>2</sup>Institute of Biological Psychiatry, Mental Health Centre Sct. Hans, Mental Health Services, Roskilde, Denmark

<sup>3</sup>Department of Clinical Medicine, University of Copenhagen, Copenhagen, Denmark

<sup>4</sup>The Lundbeck Foundation Initiative for Integrative Psychiatric Research, iPSYCH, Copenhagen, Denmark

<sup>5</sup>Department of Clinical Immunology, Aalborg University Hospital, Aalborg, Denmark

<sup>6</sup>Department of Clinical Immunology, Odense University Hospital, Odense, Denmark

<sup>7</sup>Novo Nordisk Foundation Center for Protein Research, University of Copenhagen, Copenhagen, Denmark

<sup>8</sup>Department of Neurology, Danish Headache Center, Glostrup Research Institute, Copenhagen University Hospital Rigshospitalet-Glostrup, Glostrup, Denmark

<sup>9</sup>Department of Clinical Immunology, Aarhus University Hospital, Aarhus, Denmark

<sup>10</sup>Department of Clinical Neurophysiology, Danish Center for Sleep Medicine, Copenhagen University Hospital, Rigshospitalet, Glostrup, Denmark

<sup>12</sup>Faculty of Health, University of Copenhagen, Copenhagen, Denmark

<sup>12</sup> Department of Epidemiology Research, Statens Serum Institut, Copenhagen, Denmark

<sup>13</sup>Department of Hematology, Copenhagen University Hospital, Rigshospitalet, Copenhagen, Denmark

<sup>14</sup> Department of Clinical Immunology, Zealand University Hospital, Køge, Denmark

**Table S1:** Political interventions aimed at preventing COVID-19 spread in Denmark

| Date       | Intervention                                                                                                                                                                                                                                                                                                                                                                                                                       |
|------------|------------------------------------------------------------------------------------------------------------------------------------------------------------------------------------------------------------------------------------------------------------------------------------------------------------------------------------------------------------------------------------------------------------------------------------|
| 2020-02-06 | Testing strategy towards risk of transmission                                                                                                                                                                                                                                                                                                                                                                                      |
| 2020-02-26 | First confirmed COVID-19 case in Denmark                                                                                                                                                                                                                                                                                                                                                                                           |
| 2020-03-03 | Home-quarantine for 14 days in case of exposure to COVID-19 or travelling to high-risk areas                                                                                                                                                                                                                                                                                                                                       |
| 2020-03-06 | Gatherings of 1,000 individuals were recommended to be postponed or cancelled                                                                                                                                                                                                                                                                                                                                                      |
| 2020-03-11 | Government employees without critical function were sent home, private sector employees were recommended to work from home, schools and childcare facilities were closed except for children of parents serving critical functions, and gatherings of more than 100 were prohibited. Testing strategy was changed to only include individuals with severe symptoms, vulnerable individuals or individuals with critical functions. |
| 2020-03-14 | Closing of borders                                                                                                                                                                                                                                                                                                                                                                                                                 |
| 2020-03-17 | Selected workplaces with close human contact were closed like sports facilities, gyms, shopping centres, hairdressers and others. Gatherings of more than 10 individuals were prohibited                                                                                                                                                                                                                                           |
| 2020-04-15 | Reopening of the society starting with primarily schools and childcare up to grade 5. All reopening initiatives were conditioned on the ability to introduce preventive measures minimizing close contact and securing hygiene.                                                                                                                                                                                                    |
| 2020-04-23 | Reopening of small businesses with close contact like e.g. hairdressers, driving schools, and physiotherapists.                                                                                                                                                                                                                                                                                                                    |
| 2020-05-11 | All shops were reopened.                                                                                                                                                                                                                                                                                                                                                                                                           |
| 2020-05-12 | Testing strategy broadened out to include testing of individuals at risk of COVID-19, those with symptoms of COVID-19 disease, follow up after COVID-19 symptoms as well as a general SARS-CoV-2 surveillance among health care workers and the general population.                                                                                                                                                                |
| 2020-05-18 | Reopening of school grades 6 to 10, outdoor sports activities, as well as cafés and restaurants                                                                                                                                                                                                                                                                                                                                    |
| 2020-05-20 | Reopening of teaching institutions, museums, theatres, and outdoor zoo's                                                                                                                                                                                                                                                                                                                                                           |
| 2020-06-08 | Reopening of borders to selected countries, allowing gatherings of up to 50 individuals, selected indoor sports activities, and workers to return to government institutions                                                                                                                                                                                                                                                       |

## Supplementary material

**Table S2:** Stamina scale

| Item                     |                                                                                                                 |
|--------------------------|-----------------------------------------------------------------------------------------------------------------|
| 1                        | I believe I can achieve my goals, even if there are obstacles                                                   |
| 2                        | Under pressure, I stay focused and think clearly                                                                |
| 3                        | I am not easily discouraged by failure                                                                          |
| 4                        | I am able to adapt when changes occur                                                                           |
| 5                        | I can deal with whatever comes my way                                                                           |
| 6                        | I try to see the humorous side of things when I am faced with problems                                          |
| 7                        | Having to cope with stress can make me stronger                                                                 |
| 8                        | I tend to bounce back after illness, injury or other hardships                                                  |
| 9                        | I think of myself as a strong person when dealing with life's challenges and difficulties                       |
| <b>Possible answers:</b> | 0= "not true at all", 1= "rarely true", 2= "sometimes true", 3= "often true", and 4= "true nearly all the time" |

**Table S3.** Linear regression analyses. Identification of characteristics associated with decrease or increase in mental or physical health characteristics

|                                                                 | Men (N =12,150)                |                   | Women (N =14,303)              |                   |
|-----------------------------------------------------------------|--------------------------------|-------------------|--------------------------------|-------------------|
|                                                                 | Coef. (95% CI)                 | P                 | Coef. (95% CI)                 | P                 |
| <b>Outcome: Change in mental component score<sup>x</sup></b>    |                                |                   |                                |                   |
| Change in work situation                                        |                                |                   |                                |                   |
| My work situation has not changed (reference)                   | -                              | -                 | -                              | -                 |
| <b>I work/study from home</b>                                   | <b>-0.924 (-1.263- -0.585)</b> | <b>0.004*</b>     | <b>-0.455 (-0.799-0.032)</b>   | <b>0.015</b>      |
| I was sent home without being able to work                      | -0.521 (-1.328-0.286)          | 0.206             | 0.403 (-0.483-1.289)           | 0.372             |
| I have taken a vacation or a leave of absence                   | -0.261 (-2.153-1.631)          | 0.177             | 0.402 (-2.193-2.997)           | 0.762             |
| <b>I was let go</b>                                             | <b>-1.736 (-2.963- -0.508)</b> | <b>0.006*</b>     | <b>-1.919 (-3.353-0.485)</b>   | <b>0.009*</b>     |
| <b>I still go in to work, but my work situation has changed</b> | <b>-0.566 (-0.955- -0.177)</b> | <b>0.004*</b>     | -0.385 (-0.799-0.032)          | 0.070             |
| Occupation                                                      |                                |                   |                                |                   |
| Full time job (reference)                                       | -                              | -                 | -                              | -                 |
| Part time job                                                   | 0.005 (-0.759-0.769)           | 0.989             | -0.366 (-0.805-0.073)          | 0.102             |
| Self employed                                                   | 0.056 (-0.528-0.640)           | 0.850             | -0.024 (-0.877-0.829)          | 0.956             |
| Student                                                         | <b>-2.138 (-2.181- -1.458)</b> | <b>&lt;0.001</b>  | <b>-2.329 (-2.289- -1.764)</b> | <b>&lt;0.001</b>  |
| Stay-at-home by choice                                          | -1.651 (-4.487-1.185)          | 0.254             | 0.809 (-0.862-2.481)           | 0.342             |
| Unemployed                                                      | -0.153 (-1.077-0.770)          | 0.745             | 0.617 (-0.293-1.156)           | 0.184             |
| Long-term sick leave/parental leave                             | <b>-3.942 (-5.796- -2.088)</b> | <b>&lt;0.001</b>  | -0.908 (-1.910-0.094)          | 0.076             |
| Retired                                                         | -0.022 (-0.471-0.428)          | 0.924             | <b>-1.207 (-1.734-0.680)</b>   | <b>&lt;0.001</b>  |
| Other                                                           | 1.034 (-0.213-2.291)           | 0.104             | <b>-1.091 (-2.045- -0.137)</b> | <b>0.025</b>      |
| Type of job                                                     |                                |                   |                                |                   |
| Academic (reference)                                            | -                              | -                 | -                              | -                 |
| Administration/Office work                                      | -0.103 (-0.859-0.654)          | 0.790             | 0.384 (-0.644-1.411)           | 0.464             |
| Sales/Service                                                   | -0.234 (-1.104-0.637)          | 0.599             | 0.139 (-1.893-1.170)           | 0.792             |
| Skilled worker                                                  | -0.088 (-0.838-0.661)          | 0.818             | 0.735 (-0.103-1.572)           | 0.086             |
| Unskilled worker                                                | 0.009 (-0.709-0.729)           | 0.979             | 0.221 (-0.606-1.049)           | 0.600             |
| Other                                                           | 0.054 (-0.766-0.873)           | 0.898             | -0.039 (-0.949-0.872)          | 0.934             |
| <b>Stamina score</b>                                            | <b>0.143 (0.119-0.167)</b>     | <b>&lt;0.001*</b> | <b>0.161 (0.137-0.186)</b>     | <b>&lt;0.001*</b> |
| <b>Ever been prescribed anti-depressive medication</b>          | 0.015 (-0.456-0.487)           | 0.949*            | 0.313 (-0.104-0.730)           | 0.141*            |
| Living with child(ren)                                          |                                |                   |                                |                   |
| No (reference)                                                  | -                              | -                 | -                              | -                 |
| Below school age (<5 years old)                                 | -0.306 (-1.437-0.826)          | 0.596             | 0.020 (-1.216-1.256)           | 0.975             |
| School age (5 – 18 years old)                                   | 0.241 (-0.044-0.527)           | 0.098*            | 0.298 (-0.006-0.603)           | 0.055             |
| Living with another adult (yes vs. no)                          | -0.281 (-0.565- -0.003)        | 0.052*            | 0.251 (-0.050-0.551)           | 0.102             |

## Supplementary material

|                                                                                                                              |                                |                  |                                |                  |
|------------------------------------------------------------------------------------------------------------------------------|--------------------------------|------------------|--------------------------------|------------------|
| Educational level                                                                                                            |                                |                  |                                |                  |
| Elementary school (reference)                                                                                                | -                              | -                | -                              | -                |
| High school or vocational course                                                                                             | 0.199 (-0.260-0.659)           | 0.395            | 0.334 (-0.163-0.831)           | 0.188            |
| Short length education                                                                                                       | 0.482 (-0.118-1.082)           | 0.115            | <b>0.891 (0.182-1.599)</b>     | <b>0.014</b>     |
| Medium length education                                                                                                      | 0.244 (-0.273-0.759)           | 0.355            | 0.332 (-0.118-0.852)           | 0.210            |
| <b>Long length education</b>                                                                                                 | 0.488 (-0.039-1.015)           | 0.070            | <b>0.995 (0.395-1.598)</b>     | <b>&lt;0.001</b> |
| <b>Feeling worried about the COVID pandemic and cut-off from social experiences (most of the time vs. never or sometime)</b> | <b>0.506 (0.126-0.885)</b>     | <b>0.009*</b>    | 0.444 (-0.019-0.906)           | 0.060            |
| Daily alcohol intake during the pandemic (yes vs. no)                                                                        | -0.340 (-0.865-0.185)          | 0.204            | -0.409 (-1.182-0.364)          | 0.299            |
| Smoking during the pandemic (yes vs. no)                                                                                     | -0.333 (-0.745 -0.079)         | 0.113            | -0.229 (-0.665-0.205)          | 0.301*           |
| <b>BMI during the pandemic (continuous)</b>                                                                                  | -0.019 (-0.054-0.015)          | 0.269            | <b>0.034 (0.005-0.063)</b>     | <b>0.022*</b>    |
| COVID-19 precautionary behavior (yes vs. no)                                                                                 |                                |                  |                                |                  |
| <b>Frequently washing hands</b>                                                                                              | <b>-0.485 (-0.922-0.048)</b>   | <b>0.030</b>     | -0.365 (-0.846-0.116)          | 0.137            |
| Coughing or sneezing in the elbow                                                                                            | -0.174 (-0.478-0.131)          | 0.264            | -0.279 (-0.643-0.083)          | 0.131            |
| <b>Using disposable handkerchiefs</b>                                                                                        | <b>-0.581 (-0.984-0.179)</b>   | <b>0.005</b>     | <b>-0.411 (-0.763-0.058)</b>   | <b>0.022</b>     |
| <b>Wearing disposable masks</b>                                                                                              | <b>-1.590 (-2.698-0.483)</b>   | <b>0.005*</b>    | -0.663 (-1.602-0.278)          | 0.167            |
| Avoiding handshakes                                                                                                          | -0.270 (-0.722-0.182)          | 0.241            | 0.175 (-0.336-0.686)           | 0.503            |
| Stopped greeting people with hugs and/or kisses on both cheeks                                                               | -0.129 (-0.453-0.196)          | 0.437            | -0.251 (-0.643-0.140)          | 0.209            |
| <b>Limiting use of public transportation</b>                                                                                 | <b>-0.409 (-0.675- -0.142)</b> | <b>0.003</b>     | <b>-0.628 (-0.910- -0.345)</b> | <b>&lt;0.001</b> |
| Avoid places where many people gather                                                                                        | -0.237 (-0.495-0.021)          | 0.072            | <b>-0.457 (-0.761-0.153)</b>   | <b>0.003</b>     |
| Staying home                                                                                                                 | <b>-0.839 (-1.114- -0.563)</b> | <b>&lt;0.001</b> | <b>-0.498 (-0.786-0.210)</b>   | <b>0.001</b>     |
| Working from home more often                                                                                                 | <b>-0.314 (-0.582-0.046)</b>   | <b>0.022</b>     | -0.016 (-0.309-0.278)          | 0.916            |
| <b>Avoiding travels outside one's own country or region</b>                                                                  | <b>-0.397 (-0.649- -0.144)</b> | <b>0.002*</b>    | -0.208 (-0.492-0.075)          | 0.150            |
| Outcome: Change in physical component score <sup>x</sup>                                                                     |                                |                  |                                |                  |
| Change in work situation                                                                                                     |                                |                  |                                |                  |
| My work situation has not changed (reference)                                                                                | -                              | -                | -                              | -                |
| I work/study from home                                                                                                       | 0.156 (-0.092-0.405)           | 0.217            | -0.053 (-0.303-0.197)          | 0.678            |
| I was sent home without being able to work                                                                                   | 0.216 (-0.375-0.807)           | 0.474            | 0.109 (-0.499-0.716)           | 0.726            |
| I have taken a vacation or a leave of absence                                                                                | -0.083 (-1.469-1.304)          | 0.907            | -0.819 (-2.598-0.958)          | 0.366            |
| <b>I was let go</b>                                                                                                          | 0.574 (-0.326-1.473)           | 0.211            | <b>0.969 (-0.014-0.1951)</b>   | <b>0.053*</b>    |
| I still go in to work, but my work situation has changed                                                                     | -0.094 (-0.379-0.191)          | 0.520            | -0.168 (-0.453-0.116)          | 0.247            |
| Occupation                                                                                                                   |                                |                  |                                |                  |
| Full time job (reference)                                                                                                    | -                              | -                | -                              | -                |
| Part time job                                                                                                                | -0.333 (-0.919-0.254)          | 0.266            | -0.169 (-0.486-0.146)          | 0.293            |
| Self employed                                                                                                                | 0.048 (-0.401-0.496)           | 0.835            | 0.563 (-0.052-1.178)           | 0.073            |
| Student                                                                                                                      | 0.267 (-0.255-0.788)           | 0.317            | 0.329 (-0.079-0.737)           | 0.114            |
| Stay-at-home by choice                                                                                                       | 1.545 (-0.631-3.721)           | 0.164            | -0.215 (-1.419-0.989)          | 0.726            |
| Unemployed                                                                                                                   | 0.054 (-0.655-0.763)           | 0.882            | -0.221 (-0.877-0.435)          | 0.509            |

## Supplementary material

|                                                                                                                       |                                |               |                                |                   |
|-----------------------------------------------------------------------------------------------------------------------|--------------------------------|---------------|--------------------------------|-------------------|
| <b>Long-term sick leave/parental leave</b>                                                                            | -5.710 (-7.133- -4.288)        | <0.001        | -1.491 (-2.214- -0.769)        | <0.001            |
| <b>Retired</b>                                                                                                        | -0.571 (-0.916- -0.226)        | 0.001         | -0.429 (-0.809- -0.050)        | 0.026             |
| Other                                                                                                                 | -0.423 (-1.384-0.538)          | 0.388         | 0.408 (-0.279-1.095)           | 0.245             |
| Job type                                                                                                              |                                |               |                                |                   |
| Academic (reference)                                                                                                  | -                              | -             | -                              | -                 |
| Administration/Office work                                                                                            | 0.014 (-0.275-0.304)           | 0.922         | -0.055 (-0.318-0.209)          | 0.683             |
| <b>Sales/Service</b>                                                                                                  | <b>-0.548 (-0.991- -0.106)</b> | <b>0.015*</b> | 0.386 (-0.118-0.892)           | 0.134             |
| Skilled worker                                                                                                        | -0.078 (-0.379-0.223)          | 0.612         | -0.068 (-0.573-0.436)          | 0.790             |
| <b>Unskilled worker</b>                                                                                               | <b>-0.350 (-0.896-0.195)</b>   | 0.208         | <b>-0.599 (-1.197- -0.002)</b> | <b>0.049*</b>     |
| Other                                                                                                                 | -0.014 (-0.399-0.372)          | 0.945         | -0.268 (-0.638-0.101)          | 0.155             |
| <b>Stamina score</b>                                                                                                  | 0.011 (-0.008-0.029)           | 0.245         | <b>-0.002 (-0.020-0.015)</b>   | <b>0.786*</b>     |
| Ever been prescribed anti-depressive medication                                                                       | -0.570 (-0.932- -0.208)        | 0.002         | -0.239 (-0.539-0.060)          | 0.117             |
| Living with child(ren)                                                                                                |                                |               |                                |                   |
| No (reference)                                                                                                        | -                              | -             | -                              | -                 |
| Below school age (<5 years old)                                                                                       | 0.216 (-0.652-1.085)           | 0.626         | -0.275 (-1.163-0.613)          | 0.544             |
| School age (5 – 18 years old)                                                                                         | 0.155 (-0.064-0.375)           | 0.165         | -0.040 (-0.259-0.179)          | 0.720             |
| Living with another adult (yes vs. no)                                                                                | 0.167 (-0.053-0.387)           | 0.138         | -0.067 (-0.284-0.151)          | 0.548             |
| Educational level                                                                                                     |                                |               |                                |                   |
| Elementary school (reference)                                                                                         | -                              | -             | -                              | -                 |
| High school or vocational course                                                                                      | 0.107 (-0.248-0.461)           | 0.556         | -0.238 (-0.600-0.125)          | 0.199             |
| Short length education                                                                                                | 0.095 (-0.367-0.559)           | 0.685         | -0.379 (-0.896-0.137)          | 0.150             |
| Medium length education                                                                                               | 0.150 (-0.248-0.548)           | 0.460         | -0.003 (-0.382-0.376)          | 0.988             |
| <b>Long length education</b>                                                                                          | 0.303 (-0.104-0.709)           | 0.144         | -0.319 (-0.758-0.121)          | 0.155             |
| Feeling worried about the COVID pandemic and cut-off from social experiences (most of the time vs. never or sometime) | 0.431 (0.140-0.722)            | 0.004         | <b>0.105 (-0.228-0.437)</b>    | <b>0.538*</b>     |
| Daily alcohol intake during the pandemic (yes vs. no)                                                                 | -0.185 (-0.589-0.219)          | 0.370         | -0.141 (-0.691-0.409)          | 0.615             |
| Smoking during the pandemic (yes vs. no)                                                                              | 0.199 (-0.117-0.515)           | 0.218         | 0.029 (-0.283-0.342)           | 0.853             |
| <b>BMI during the pandemic (continuous)</b>                                                                           | <b>-0.039 (-0.065- -0.013)</b> | <b>0.004*</b> | <b>-0.044 (-0.065- -0.023)</b> | <b>&lt;0.001*</b> |
| Specific COVID-precautions (yes vs. no)                                                                               |                                |               |                                |                   |
| Frequently washing hands                                                                                              | 0.112 (-0.224-0.448)           | 0.512         | -0.001 (-0.347-0.345)          | 0.996             |
| Coughing or sneezing in the elbow                                                                                     | 0.139 (-0.094-0.374)           | 0.243         | 0.229 (-0.038-0.484)           | 0.094             |
| <b>Using disposable handkerchiefs</b>                                                                                 | <b>-0.235 (-0.544-0.074)</b>   | <b>0.135*</b> | -0.013 (-0.267-0.240)          | 0.919             |
| <b>Wearing disposable masks</b>                                                                                       | <b>-0.680 (-1.530-0.169)</b>   | 0.117         | <b>-0.625 (-1.301-0.051)</b>   | <b>0.070*</b>     |
| Avoiding handshakes                                                                                                   | -0.074 (-0.421-0.273)          | 0.677         | -0.098 (-0.465-0.269)          | 0.601             |
| Stopped greeting people with hugs and/or kisses on both cheeks                                                        | -0.042 (-0.291-0.207)          | 0.740         | 0.051 (-0.231-0.332)           | 0.725             |
| <b>Limiting use of public transportation</b>                                                                          | <b>-0.080 (-0.285-0.124)</b>   | 0.442         | <b>0.053 (-0.150-0.256)</b>    | <b>0.610*</b>     |
| Avoid places where many people gather                                                                                 | 0.017 (-0.181-0.215)           | 0.865         | -0.130 (-0.349-0.089)          | 0.243             |
| <b>Staying home</b>                                                                                                   | <b>-0.267 (-0.479- -0.556)</b> | <b>0.013*</b> | <b>-0.471 (-0.678- -0.263)</b> | <b>&lt;0.001*</b> |
| Working from home more often                                                                                          | 0.083 (-0.123-0.289)           | 0.428         | -0.033 (-0.244-0.178)          | 0.761             |

## Supplementary material

|                                                          |                                |                   |                                |                   |
|----------------------------------------------------------|--------------------------------|-------------------|--------------------------------|-------------------|
| Avoiding travels outside one's own country or region     | 0.040 (-0.153-0.234)           | 0.683             | 0.036 (-0.168-0.239)           | 0.731             |
| Outcome: Change in stress score <sup>x</sup>             |                                |                   |                                |                   |
|                                                          | Men (N=5,790)                  |                   | Women (N=6,617)                |                   |
| Change in work situation                                 |                                |                   |                                |                   |
| My work situation has not changed (reference)            | -                              | -                 | -                              | -                 |
| I work/study from home                                   | 0.421 (0.104-0.737)            | 0.009             | 0.289 (-0.056-0.635)           | 0.101             |
| I was sent home without being able to work               | -0.175 (-0.917-0.567)          | 0.644             | -0.108 (-0.931-0.715)          | 0.797             |
| I have taken a vacation or a leave of absence            | 1.685 (-0.238-3.607)           | 0.086             | 1.554 (-1.051-4.159)           | 0.242             |
| I was let go                                             | 1.574 (0.415-2.732)            | 0.008             | 1.719 (0.437-3.001)            | 0.009             |
| I still go in to work, but my work situation has changed | 0.426 (0.058-0.794)            | 0.023             | 0.417 (0.022-0.812)            | 0.038             |
| <b>Stamina score (continuous)</b>                        | <b>-0.116 (-0.141- -0.091)</b> | <b>&lt;0.001*</b> | <b>-0.147 (-0.172- -0.121)</b> | <b>&lt;0.001*</b> |
| Occupation                                               |                                |                   |                                |                   |
| Full time job (reference)                                | -                              | -                 | -                              | -                 |
| Part time job                                            | 0.405 (-0.454-1.264)           | 0.355             | 0.148 (-0.288-0.585)           | 0.505             |
| Self employed                                            | 0.333 (-0.247-0.914)           | 0.260             | 0.152 (-0.699-1.003)           | 0.727             |
| Student                                                  | 0.822 (0.233-1.413)            | 0.006             | 1.771 (1.273-2.268)            | <0.001            |
| Stay-at-home by choice                                   | 1.269 (-1.415-3.953)           | 0.354             | 0.012 (-1.559-1.584)           | 0.988             |
| Unemployed                                               | 1.362 (0.454-2.271)            | 0.003             | 0.149 (-0.750-1.047)           | 0.746             |
| Long-term sick leave/parental leave                      | 3.643 (1.579-5.708)            | 0.001             | -0.604 (-1.842-0.634)          | 0.339             |
| Retired                                                  | 0.431 (-0.213-1.076)           | 0.190             | 0.085 (-0.608-0.778)           | 0.809             |
| Other                                                    | 0.027 (-1.391-1.446)           | 0.969             | -0.412 (-1.433-0.609)          | 0.429             |
| Job type                                                 |                                |                   |                                |                   |
| Academic (reference)                                     | -                              | -                 | -                              | -                 |
| <b>Administration/Office work</b>                        | <b>-0.365 (-0.723- -0.006)</b> | <b>0.046*</b>     | <b>-0.719 (-1.074- -0.365)</b> | <b>&lt;0.001*</b> |
| <b>Sales/Service</b>                                     | <b>-0.749 (-1.299- -0.199)</b> | <b>0.008*</b>     | -0.273 (-0.918-0.373)          | 0.406             |
| Skilled worker                                           | -0.431 (-0.809- -0.052)        | 0.026             | -0.388 (-1.058-0.282)          | 0.256             |
| Unskilled worker                                         | -0.219 (-0.931-0.494)          | 0.547             | -0.484 (-1.292-0.325)          | 0.241             |
| Other                                                    | -0.410 (-0.908-0.087)          | 0.106             | -0.089 (-0.582-0.402)          | 0.723             |
| Ever been prescribed anti-depressive medication          | 0.147 (-0.372-0.666)           | 0.579             | 0.312 (-0.132-0.755)           | 0.168             |
| Living with child(ren)                                   |                                |                   |                                |                   |
| No (reference)                                           | -                              | -                 | -                              | -                 |
| Below school age (<5 years old)                          | 0.037 (-1.039-1.113)           | 0.946             | 0.689 (-0.824-2.203)           | 0.372             |
| School age (5 – 18 years old)                            | -0.146 (-0.434-0.142)          | 0.322             | -0.208 (-0.505-0.089)          | 0.170             |
| Living with another adult (yes vs. no)                   | 0.189 (-0.108-0.487)           | 0.212             | 0.119 (-0.187-0.426)           | 0.445             |
| Educational level                                        |                                |                   |                                |                   |
| Elementary school (reference)                            | -                              | -                 | -                              | -                 |
| High school or vocational course                         | -0.125 (-0.618-0.368)          | 0.618             | 0.018 (-0.482-0.518)           | 0.943             |
| Short length education                                   | -0.139 (-0.767-0.488)          | 0.664             | -0.204 (-0.930-0.522)          | 0.582             |

## Supplementary material

|                                                                                                                       |                       |       |                       |       |
|-----------------------------------------------------------------------------------------------------------------------|-----------------------|-------|-----------------------|-------|
| Medium length education                                                                                               | 0.412 (-0.138-0.962)  | 0.142 | 0.309 (-0.225-0.840)  | 0.257 |
| Long length education                                                                                                 | 0.113 (-0.449-0.674)  | 0.693 | 0.506 (-0.112-1.122)  | 0.108 |
| Feeling worried about the COVID pandemic and cut-off from social experiences (most of the time vs. never or sometime) | -0.047 (-0.429-0.336) | 0.811 | 0.087 (-0.377-0.551)  | 0.713 |
| Daily alcohol intake during the pandemic (yes vs. no)                                                                 | -0.055 (-0.755-0.644) | 0.877 | -0.143 (-1.09-0.805)  | 0.767 |
| Smoking during the pandemic (yes vs. no)                                                                              | 0.002 (-0.425-0.429)  | 0.994 | 0.036 (-0.398-0.470)  | 0.871 |
| BMI during the pandemic (continuous)                                                                                  | -0.013 (-0.048-0.022) | 0.458 | -0.014 (-0.043-0.015) | 0.329 |
| Specific COVID-precautions (yes vs. no)                                                                               |                       |       |                       |       |
| Frequently washing hands                                                                                              | 0.139 (-0.284-0.563)  | 0.518 | 0.022 (-0.449-0.493)  | 0.929 |
| Coughing or sneezing in the elbow                                                                                     | 0.018 (-0.289-0.326)  | 0.904 | -0.034 (-0.396-0.328) | 0.854 |
| Using disposable handkerchiefs                                                                                        | -0.001 (-0.467-0.464) | 0.996 | 0.021 (-0.350-0.392)  | 0.912 |
| Wearing disposable masks                                                                                              | 0.447 (-0.725-1.619)  | 0.454 | 0.371 (-0.614-0.1357) | 0.460 |
| Avoiding handshakes                                                                                                   | 0.161 (-0.284-0.607)  | 0.478 | 0.171 (-0.309-0.652)  | 0.485 |
| Stopped greeting people with hugs and/or kisses on both cheeks                                                        | -0.028 (-0.355-0.300) | 0.869 | 0.292 (-0.086-0.669)  | 0.130 |
| Limiting use of public transportation                                                                                 | 0.186 (-0.091-0.463)  | 0.188 | 0.431 (0.143-0.718)   | 0.003 |
| Avoid places where many people gather                                                                                 | 0.057 (-0.203-0.318)  | 0.667 | 0.309 (0.011-0.609)   | 0.042 |
| Staying home                                                                                                          | 0.349 (0.063-0.634)   | 0.017 | 0.506 (0.213-0.799)   | 0.001 |
| Working from home more often                                                                                          | 0.183 (-0.078-0.444)  | 0.170 | 0.129 (-0.158-0.416)  | 0.377 |
| Avoiding travels outside one's own country or region                                                                  | 0.048 (-0.209-0.305)  | 0.715 | 0.194 (-0.089-0.478)  | 0.180 |

\*The presented coefficients are crude effect estimates only adjusted for age and number of days between answering the first questionnaire and the questionnaire answered during the COVID-19 pandemic. \*indicates the covariates with a P-value<0.05 in the model comprising all covariates.

×changes in scores were calculated by subtracting the score before the COVID-19 pandemic from the score during. A negative score represents a decrease, while a positive score represents an increase

Factors with a P-value<0.05 are marked in bold writing



**Table S4.** Multinomial logistic regression analyses displaying relative risk ratios (RRR). Identification of characteristics associated with developing a poor quality of sleep phenotype or becoming free of a poor quality of sleep phenotype

|                                                          | Men (N =5,790)                    |                   |                                   |               | Women (N =6,617)                  |                   |                                   |               |
|----------------------------------------------------------|-----------------------------------|-------------------|-----------------------------------|---------------|-----------------------------------|-------------------|-----------------------------------|---------------|
|                                                          | From non-case to case             |                   | From case to non-case             |               | From non-case to case             |                   | From case to non-case             |               |
|                                                          | RRR<br>(95% CI)                   | P                 | RRR<br>(95% CI)                   | P             | RRR<br>(95% CI)                   | P                 | RRR<br>(95% CI)                   | P             |
| Outcome: Insomnia (no change = reference)                |                                   |                   |                                   |               |                                   |                   |                                   |               |
| Change in work situation                                 |                                   |                   |                                   |               |                                   |                   |                                   |               |
| My work situation has not changed (reference)            | -                                 | -                 | -                                 | -             | -                                 | -                 | -                                 | -             |
| I work/study from home                                   | 0.98<br>(0.79-1.20)               | 0.822             | 0.97<br>(0.78-1.20)               | 0.751         | 1.15<br>(0.96-1.37)               | 0.125             | 0.96<br>(0.78-1.18)               | 0.720         |
| I was sent home without being able to work               | 1.09<br>(0.68-1.75)               | 0.729             | 1.14<br>(0.71-1.84)               | 0.591         | 1.43<br>(0.96-2.12)               | 0.076             | 1.15<br>(0.72-1.84)               | 0.555         |
| I have taken a vacation or a leave of absence            | 1.55<br>(0.52-4.61)               | 0.433             | 1.19<br>(0.35-4.08)               | 0.778         | 0.87<br>(0.20-3.84)               | 0.857             | 0.43<br>(0.06-3.29)               | 0.418         |
| I was let go                                             | 1.10<br>(0.52-2.35)               | 0.800             | 1.58<br>(0.81-3.06)               | 0.180         | 1.23<br>(0.67-2.28)               | 0.502             | 0.49<br>(0.18-1.37)               | 0.175         |
| I still go in to work, but my work situation has changed | 0.88<br>(0.69-1.13)               | 0.322             | 1.05<br>(0.83-1.34)               | 0.682         | 1.17<br>(0.95-1.44)               | 0.142             | 1.09<br>(0.87-1.36)               | 0.443         |
| Occupation                                               |                                   |                   |                                   |               |                                   |                   |                                   |               |
| Full time job (reference)                                | -                                 | -                 | -                                 | -             | -                                 | -                 | -                                 | -             |
| Part time job                                            | 0.98<br>(0.54-1.76)               | 0.945             | 1.64<br>(1.02-2.63)               | 0.042         | 1.02<br>(0.80-1.28)               | 0.920             | 0.96<br>(0.75-1.239)              | 0.731         |
| Self employed                                            | 0.84<br>(0.56-1.26)               | 0.405             | 1.02<br>(0.71-1.48)               | 0.911         | 0.83<br>(0.50-1.37)               | 0.460             | 1.20<br>(0.77-1.86)               | 0.424         |
| Student                                                  | 1.29<br>(0.89-1.87)               | 0.176             | 1.04<br>(0.68-1.59)               | 0.861         | 1.31<br>(1.04-1.65)               | 0.022             | 1.13<br>(0.82-1.57)               | 0.459         |
| Stay-at-home by choice                                   | Too few                           |                   | 1.14<br>(0.25-5.20)               | 0.863         | 1.48<br>(0.68-3.25)               | 0.324             | 2.40<br>(1.19-4.84)               | 0.014         |
| Unemployed                                               | 2.16<br>(1.34-3.48)               | 0.002             | 1.46<br>(0.83-2.56)               | 0.190         | 1.10<br>(0.70-1.73)               | 0.682             | 1.28<br>(0.77-2.10)               | 0.339         |
| Long-term sick leave/parental leave                      | 4.15<br>(1.73-9.94)               | 0.001             | Too few                           |               | 1.74<br>(1.01-3.01)               | 0.047             | 1.69<br>(0.87-3.28)               | 0.121         |
| Retired                                                  | 1.16<br>(0.79-1.72)               | 0.446             | 0.85<br>(0.57-1.29)               | 0.446         | 1.06<br>(0.70-1.60)               | 0.779             | 1.16<br>(0.83-1.62)               | 0.376         |
| Other                                                    | 1.33<br>(0.59-3.02)               | 0.488             | 0.72<br>(0.25-2.04)               | 0.536         | 0.79<br>(0.43-1.45)               | 0.439             | 0.86<br>(0.49-1.53)               | 0.613         |
| Job type                                                 |                                   |                   |                                   |               |                                   |                   |                                   |               |
| Academic (reference)                                     | -                                 | -                 | -                                 | -             | -                                 | -                 | -                                 | -             |
| Administration/Office work                               | 0.92<br>(0.72-1.17)               | 0.494             | 0.86<br>(0.67-1.10)               | 0.223         | 0.99<br>(0.81-1.20)               | 0.885             | 1.01<br>(0.82-1.24)               | 0.944         |
| Sales/Service                                            | 1.16<br>(0.81-1.65)               | 0.424             | 1.05<br>(0.73-1.50)               | 0.799         | 0.84<br>(0.58-1.21)               | 0.340             | 0.79<br>(0.52-1.20)               | 0.272         |
| Skilled worker                                           | 1.09<br>(0.85-1.40)               | 0.491             | 0.92<br>(0.72-1.19)               | 0.540         | 1.02<br>(0.71-1.48)               | 0.900             | 1.08<br>(0.74-1.58)               | 0.686         |
| <b>Unskilled worker</b>                                  | <b>1.64</b><br><b>(1.09-2.46)</b> | <b>0.017*</b>     | 0.81<br>(0.48-1.35)               | 0.411         | 0.98<br>(0.63-1.52)               | 0.916             | 0.73<br>(0.43-1.23)               | 0.235         |
| Other                                                    | 0.94<br>(0.67-1.33)               | 0.731             | 1.11<br>(0.81-1.52)               | 0.512         | 1.07<br>(0.82-1.40)               | 0.623             | 1.27<br>(0.97-1.66)               | 0.083         |
| <b>Stamina score (continuous)</b>                        | <b>0.95</b><br><b>(0.94-0.97)</b> | <b>&lt;0.001*</b> | 0.98<br>(0.97-1.00)               | 0.052         | <b>0.96</b><br><b>(0.94-0.97)</b> | <b>&lt;0.001*</b> | <b>1.00</b><br><b>(0.99-1.02)</b> | <b>0.547*</b> |
| <b>Ever been prescribed anti-depressive medication</b>   | 1.48<br>(1.10-1.99)               | 0.010             | 1.01<br>(0.72-1.43)               | 0.935         | <b>1.48</b><br><b>(1.18-1.82)</b> | <b>&lt;0.001*</b> | 1.23<br>(0.97-1.56)               | 0.091         |
| Living with child(ren)                                   |                                   |                   |                                   |               |                                   |                   |                                   |               |
| No (reference)                                           | -                                 | -                 | -                                 | -             | -                                 | -                 | -                                 | -             |
| Below school age (<5 years old)                          | 1.08<br>(0.56-2.10)               | 0.809             | 1.33<br>(0.70-2.53)               | 0.377         | 0.97<br>(0.48-1.96)               | 0.933             | 0.49<br>(0.15-1.60)               | 0.239         |
| <b>School age (5 – 18 years old)</b>                     | 0.79<br>(0.66-0.95)               | 0.11              | <b>0.73</b><br><b>(0.61-0.87)</b> | <b>0.001*</b> | 0.83<br>(0.71-0.96)               | 0.015             | <b>0.75</b><br><b>(0.64-0.89)</b> | <b>0.001*</b> |
| Living with another adult (yes vs. no)                   | 0.82<br>(0.68-0.99)               | 0.036             | 0.89<br>(0.73-1.08)               | 0.246         | 0.90<br>(0.77-1.05)               | 0.190             | 0.97<br>(0.82-1.16)               | 0.756         |
| Educational level                                        |                                   |                   |                                   |               |                                   |                   |                                   |               |
| Elementary school (reference)                            | -                                 | -                 | -                                 | -             | -                                 | -                 | -                                 | -             |
| High school or vocational course                         | 0.73<br>(0.54-0.99)               | 0.041             | 1.10<br>(0.78-1.55)               | 0.597         | 0.94<br>(0.73-1.21)               | 0.641             | 0.82<br>(0.62-1.10)               | 0.187         |
| Short length education                                   | 0.72<br>(0.49-1.08)               | 0.112             | 1.11<br>(0.73-1.70)               | 0.635         | 0.69<br>(0.46-1.05)               | 0.086             | 0.96<br>(0.66-1.42)               | 0.851         |

## Supplementary material

|                                                                                           |                    |                   |                    |               |                    |               |             |       |
|-------------------------------------------------------------------------------------------|--------------------|-------------------|--------------------|---------------|--------------------|---------------|-------------|-------|
| Medium length education                                                                   | 0.77               | 0.128             | 1.09               | 0.669         | 0.78               | 0.081         | 0.75        | 0.055 |
|                                                                                           | (0.55-1.08)        |                   | (0.74-1.60)        |               | (0.59-1.03)        |               | (0.56-1.01) |       |
| <b>Long length education</b>                                                              | 0.88               | 0.464             | <b>1.47</b>        | <b>0.045*</b> | 0.87               | 0.394         | 0.87        | 0.436 |
|                                                                                           | (0.62-1.24)        |                   | <b>(1.01-2.15)</b> |               | (0.63-1.20)        |               | (0.62-1.23) |       |
| Feeling worried about the COVID pandemic and cut-off from social experiences (yes vs. no) | 0.70               | 0.011             | 0.87               | 0.297         | 0.98               | 0.843         | 0.90        | 0.425 |
|                                                                                           | (0.54-0.92)        |                   | (0.68-1.13)        |               | (0.76-1.25)        |               | (0.69-1.17) |       |
| Daily alcohol intake during the pandemic (yes vs. no)                                     | 1.34               | 0.161             | 0.88               | 0.582         | 0.90               | 0.733         | 1.39        | 0.145 |
|                                                                                           | (0.89-2.01)        |                   | (0.55-1.40)        |               | (0.50-1.63)        |               | (0.89-2.15) |       |
| Smoking during the pandemic (yes vs. no)                                                  | 1.20               | 0.171             | 0.95               | 0.702         | 1.07               | 0.537         | 0.92        | 0.526 |
|                                                                                           | (0.92-1.56)        |                   | (0.71-1.26)        |               | (0.86-1.33)        |               | (0.71-1.19) |       |
| BMI during the pandemic (continuous)                                                      | 1.01               | 0.422             | 1.01               | 0.406         | 1.01               | 0.116         | 1.00        | 0.828 |
|                                                                                           | (0.99-1.03)        |                   | (0.99-1.03)        |               | (1.00-1.03)        |               | (0.99-1.02) |       |
| Specific COVID-precautions (yes vs. no)                                                   |                    |                   |                    |               |                    |               |             |       |
| Frequently washing hands                                                                  | 1.09               | 0.560             | 0.97               | 0.816         | 1.19               | 0.170         | 1.22        | 0.183 |
|                                                                                           | (0.81-1.44)        |                   | (0.73-1.28)        |               | (0.93-1.53)        |               | (0.91-1.63) |       |
| <b>Coughing or sneezing in the elbow</b>                                                  | 0.97               | 0.782             | 0.99               | 0.898         | <b>0.92</b>        | <b>0.347*</b> | 1.13        | 0.257 |
|                                                                                           | (0.80-1.18)        |                   | (0.81-1.21)        |               | <b>(0.77-1.10)</b> |               | (0.91-1.41) |       |
| Using disposable handkerchiefs                                                            | 1.22               | 0.180             | 1.20               | 0.200         | 1.06               | 0.584         | 0.95        | 0.624 |
|                                                                                           | (0.91-1.61)        |                   | (0.91-1.60)        |               | (0.87-1.29)        |               | (0.78-1.16) |       |
| Wearing disposable masks                                                                  | 1.10               | 0.797             | 1.61               | 0.156         | 0.96               | 0.876         | 0.91        | 0.755 |
|                                                                                           | (0.52-2.34)        |                   | (0.83-3.12)        |               | (0.57-1.62)        |               | (0.51-1.61) |       |
| Avoiding handshakes                                                                       | 0.84               | 0.228             | 0.98               | 0.908         | 0.94               | 0.604         | 1.08        | 0.618 |
|                                                                                           | (0.64-1.11)        |                   | (0.73-1.32)        |               | (0.74-1.19)        |               | (0.80-1.44) |       |
| Stopped greeting people with hugs and/or kisses on both cheeks                            | 1.03               | 0.807             | 0.94               | 0.558         | 0.98               | 0.816         | 1.15        | 0.228 |
|                                                                                           | (0.83-1.27)        |                   | (0.76-1.16)        |               | (0.81-1.18)        |               | (0.91-1.45) |       |
| Limiting use of public transportation                                                     | 1.07               | 0.462             | 1.04               | 0.643         | 1.08               | 0.270         | 1.16        | 0.081 |
|                                                                                           | (0.90-1.27)        |                   | (0.87-1.25)        |               | (0.94-1.26)        |               | (0.98-1.36) |       |
| Avoid places where many people gather                                                     | 0.99               | 0.996             | 0.84               | 0.056         | 1.05               | 0.510         | 1.13        | 0.152 |
|                                                                                           | (0.85-1.18)        |                   | (0.72-1.00)        |               | (0.90-1.23)        |               | (0.95-1.35) |       |
| Staying home                                                                              | 0.94               | 0.538             | 0.91               | 0.332         | 1.19               | 0.020         | 1.16        | 0.083 |
|                                                                                           | (0.78-1.14)        |                   | (0.75-1.10)        |               | (1.03-1.38)        |               | (0.98-1.37) |       |
| Working from home more often                                                              | 0.98               | 0.802             | 1.05               | 0.608         | 1.01               | 0.916         | 0.95        | 0.560 |
|                                                                                           | (0.83-1.16)        |                   | (0.88-1.24)        |               | (0.87-1.17)        |               | (0.81-1.12) |       |
| Avoiding travels outside one's own country or region                                      | 0.94               | 0.465             | 0.99               | 0.906         | 0.94               | 0.418         | 1.16        | 0.077 |
|                                                                                           | (0.80-1.11)        |                   | (0.84-1.17)        |               | (0.81-1.09)        |               | (0.98-1.37) |       |
| <b>Outcome: Daytime fatigue (reference = no change)</b>                                   |                    |                   |                    |               |                    |               |             |       |
| Change in work situation                                                                  |                    |                   |                    |               |                    |               |             |       |
| My work situation has not changed (reference)                                             | -                  | -                 | -                  | -             | -                  | -             | -           | -     |
| I work/study from home                                                                    | 1.02               | 0.882             | 0.87               | 0.505         | 1.01               | 0.924         | 1.06        | 0.725 |
|                                                                                           | (0.75-1.40)        |                   | (0.58-1.31)        |               | (0.80-1.29)        |               | (0.75-1.50) |       |
| I was sent home without being able to work                                                | 1.25               | 0.512             | 1.19               | 0.684         | 1.58               | 0.067         | 0.68        | 0.455 |
|                                                                                           | (9.64-2.44)        |                   | (0.51-2.79)        |               | (0.97-2.58)        |               | (0.25-1.88) |       |
| I have taken a vacation or a leave of absence                                             | 1.93               | 0.379             | 1.43               | 0.731         | Too few            |               | 1.85        | 0.552 |
|                                                                                           | (0.45-8.33)        |                   | (0.19-10.7)        |               |                    |               | (0.24-14.1) |       |
| <b>I was let go</b>                                                                       | <b>2.38</b>        | <b>0.036*</b>     | 1.07               | 0.926         | 2.22               | 0.021         | 2.33        | 0.079 |
|                                                                                           | <b>(1.06-5.33)</b> |                   | (0.26-4.47)        |               | (1.13-4.36)        |               | (0.91-5.96) |       |
| I still go in to work, but my work situation has changed                                  | 1.05               | 0.795             | 0.69               | 0.163         | 1.09               | 0.551         | 0.92        | 0.690 |
|                                                                                           | (0.73-1.51)        |                   | (0.41-1.16)        |               | (0.82-1.45)        |               | (0.60-1.40) |       |
| Occupation                                                                                |                    |                   |                    |               |                    |               |             |       |
| Full time job (reference)                                                                 | -                  | -                 | -                  | -             | -                  | -             | -           | -     |
| <b>Part time job</b>                                                                      | 1.06               | 0.898             | <b>3.24</b>        | <b>0.001*</b> | 0.94               | 0.728         | 1.16        | 0.495 |
|                                                                                           | (0.46-2.43)        |                   | <b>(1.65-6.38)</b> |               | (0.67-1.32)        |               | (0.75-1.79) |       |
| Self employed                                                                             | 1.13               | 0.665             | 1.47               | 0.252         | 1.16               | 0.644         | 0.58        | 0.358 |
|                                                                                           | (0.65-1.97)        |                   | (0.76-2.85)        |               | (0.62-2.17)        |               | (0.18-1.85) |       |
| Student                                                                                   | 0.99               | 0.956             | 0.74               | 0.427         | 1.45               | 0.009         | 1.25        | 0.349 |
|                                                                                           | (0.60-1.62)        |                   | (0.35-1.56)        |               | (1.10-1.92)        |               | (0.79-1.98) |       |
| Stay-at-home by choice                                                                    | 7.14               | 0.003             | Too few            |               | 0.96               | 0.946         | Too few     |       |
|                                                                                           | (1.92-26.5)        |                   |                    |               | (0.29-3.13)        |               |             |       |
| Unemployed                                                                                | 2.19               | 0.014             | 1.32               | 0.597         | 2.46               | <0.001        | 2.07        | 0.044 |
|                                                                                           | (1.17-4.07)        |                   | (0.47-3.67)        |               | (1.56-3.88)        |               | (1.02-4.18) |       |
| Long-term sick leave/parental leave                                                       | 6.15               | <0.001            | 2.30               | 0.423         | 2.29               | <0.001        | 3.16        | 0.005 |
|                                                                                           | (2.22-17.0)        |                   | (0.30-17.5)        |               | (1.21-4.35)        |               | (1.40-7.10) |       |
| Retired                                                                                   | 1.78               | 0.060             | 4.94               | <0.001        | 2.81               | <0.001        | 1.07        | 0.868 |
|                                                                                           | (0.97-3.27)        |                   | (2.82-8.69)        |               | (1.75-4.50)        |               | (0.49-2.31) |       |
| Other                                                                                     | 0.52               | 0.517             | 1.92               | 0.371         | 1.29               | 0.504         | 1.49        | 0.391 |
|                                                                                           | (0.07-3.79)        |                   | (0.56-8.07)        |               | (0.62-2.69)        |               | (0.60-3.78) |       |
| Job type                                                                                  |                    |                   |                    |               |                    |               |             |       |
| Academic (reference)                                                                      | -                  | -                 | -                  | -             | -                  | -             | -           | -     |
| Administration/Office work                                                                | 0.90               | 0.567             | 1.20               | 0.490         | 0.82               | 0.192         | 1.50        | 0.045 |
|                                                                                           | (0.60-1.32)        |                   | (0.72-1.98)        |               | (0.61-1.10)        |               | (1.01-2.22) |       |
| Sales/Service                                                                             | 0.66               | 0.236             | 1.61               | 0.169         | 1.40               | 0.124         | 1.71        | 0.102 |
|                                                                                           | (0.33-1.32)        |                   | (0.82-3.16)        |               | (0.91-2.15)        |               | (0.89-3.25) |       |
| <b>Skilled worker</b>                                                                     | <b>2.02</b>        | <b>&lt;0.001*</b> | 2.38               | <0.001        | 1.22               | 0.432         | 2.63        | 0.001 |
|                                                                                           | <b>(1.44-2.83)</b> |                   | (1.52-3.72)        |               | (0.74-2.02)        |               | (1.47-4.71) |       |

## Supplementary material

|                                                                                           |                    |                   |                    |                   |                    |                   |                    |               |
|-------------------------------------------------------------------------------------------|--------------------|-------------------|--------------------|-------------------|--------------------|-------------------|--------------------|---------------|
| <b>Unskilled worker</b>                                                                   | <b>2.41</b>        | <b>0.002*</b>     | 2.38               | 0.029             | 2.31               | 0.001             | 2.10               | 0.057         |
|                                                                                           | <b>(1.37-4.22)</b> |                   | (1.09-5.17)        |                   | (1.43-3.73)        |                   | (0.98-4.52)        |               |
| Other                                                                                     | 1.21               | 0.463             | 1.09               | 0.824             | 1.11               | 0.576             | 1.83               | 0.017         |
|                                                                                           | (0.73-1.99)        |                   | (0.52-2.26)        |                   | (0.76-1.63)        |                   | (1.11-3.02)        |               |
| <b>Stamina score (continuous)</b>                                                         | <b>0.90</b>        | <b>&lt;0.001*</b> | <b>0.93</b>        | <b>&lt;0.001*</b> | <b>0.91</b>        | <b>&lt;0.001*</b> | 0.95               | <0.001        |
|                                                                                           | <b>(0.89-0.92)</b> |                   | <b>(0.91-0.96)</b> |                   | <b>(0.90-0.92)</b> |                   | (0.92-0.97)        |               |
| Ever been prescribed anti-depressive medication (yes vs. no)                              | 2.69               | <0.001            | 1.20               | 0.557             | 1.87               | <0.001            | 1.91               | 0.001         |
|                                                                                           | (1.88-3.86)        |                   | (0.66-2.18)        |                   | (1.44-2.44)        |                   | (1.32-2.77)        |               |
| Living with child(ren)                                                                    |                    |                   |                    |                   |                    |                   |                    |               |
| No (reference)                                                                            | -                  | -                 | -                  | -                 | -                  | -                 | -                  | -             |
| Below school age (<5 years old)                                                           | 0.90               | 0.825             | 1.83               | 0.263             | 0.87               | 0.768             | 1.62               | 0.427         |
|                                                                                           | (0.35-2.29)        |                   | (0.63-5.27)        |                   | (0.34-2.21)        |                   | (0.49-5.35)        |               |
| School age (5 – 18 years old)                                                             | 0.83               | 0.176             | 1.15               | 0.455             | 0.84               | 0.091             | 1.10               | 0.553         |
|                                                                                           | (0.64-1.08)        |                   | (0.80-1.64)        |                   | (0.69-1.03)        |                   | (0.81-1.48)        |               |
| Living with another adult (yes vs. no)                                                    | 0.91               | 0.492             | 1.23               | 0.281             | 0.79               | 0.020             | 0.96               | 0.800         |
|                                                                                           | (0.69-1.20)        |                   | (0.84-1.81)        |                   | (0.64-0.96)        |                   | (0.71-1.31)        |               |
| Educational level                                                                         |                    |                   |                    |                   |                    |                   |                    |               |
| Elementary school (reference)                                                             | -                  | -                 | -                  | -                 | -                  | -                 | -                  | -             |
| <b>High school or vocational course</b>                                                   | 0.75               | 0.162             | 0.59               | 0.023             | 0.74               | 0.049             | <b>0.65</b>        | <b>0.050*</b> |
|                                                                                           | (0.50-1.12)        |                   | (0.37-0.92)        |                   | (0.54-1.00)        |                   | <b>(0.43-1.00)</b> |               |
| <b>Short length education</b>                                                             | <b>0.34</b>        | <b>0.002*</b>     | 0.46               | 0.025             | 0.52               | 0.022             | <b>0.55</b>        | <b>0.100*</b> |
|                                                                                           | <b>(0.17-0.67)</b> |                   | (0.24-0.91)        |                   | (0.29-0.91)        |                   | <b>(0.27-1.12)</b> |               |
| <b>Medium length education</b>                                                            | 0.52               | 0.009             | <b>0.29</b>        | <b>&lt;0.001*</b> | 0.65               | 0.016             | <b>0.42</b>        | <b>0.001*</b> |
|                                                                                           | (0.32-0.85)        |                   | <b>(0.16-0.55)</b> |                   | (0.46-0.92)        |                   | <b>(0.26-0.70)</b> |               |
| <b>Long length education</b>                                                              | 0.60               | 0.039             | <b>0.25</b>        | <b>&lt;0.001*</b> | <b>0.51</b>        | <b>0.003*</b>     | <b>0.46</b>        | <b>0.012*</b> |
|                                                                                           | (0.37-0.97)        |                   | <b>(0.13-0.50)</b> |                   | <b>(0.22-0.80)</b> |                   | <b>(0.15-0.84)</b> |               |
| Feeling worried about the COVID pandemic and cut-off from social experiences (yes vs. no) | 0.75               | 0.156             | 0.60               | 0.068             | 0.96               | 0.821             | 0.84               | 0.504         |
|                                                                                           | (0.50-1.12)        |                   | (0.34-1.04)        |                   | (0.68-1.35)        |                   | (0.51-1.40)        |               |
| Daily alcohol intake during the pandemic (yes vs. no)                                     | 1.27               | 0.477             | 0.87               | 0.756             | 1.00               | 0.998             | 2.36               | 0.025         |
|                                                                                           | (0.66-2.46)        |                   | (0.35-2.16)        |                   | (0.43-2.31)        |                   | (1.11-4.98)        |               |
| <b>Smoking during the pandemic (yes vs. no)</b>                                           | 1.47               | 0.031             | 1.19               | 0.482             | <b>1.46</b>        | <b>0.004*</b>     | 1.55               | 0.023         |
|                                                                                           | (1.04-2.09)        |                   | (0.73-1.94)        |                   | <b>(1.13-1.90)</b> |                   | (1.06-2.25)        |               |
| <b>BMI during the pandemic (continuous)</b>                                               | 1.03               | 0.103             | <b>1.04</b>        | <b>0.079*</b>     | 1.03               | 0.001             | 1.02               | 0.099         |
|                                                                                           | (0.99-1.06)        |                   | <b>(0.99-1.08)</b> |                   | (1.01-1.05)        |                   | (0.99-1.05)        |               |
| Specific COVID-precautions (yes vs. no)                                                   |                    |                   |                    |                   |                    |                   |                    |               |
| Frequently washing hands                                                                  | 1.12               | 0.577             | 0.95               | 0.834             | 0.94               | 0.703             | 0.73               | 0.140         |
|                                                                                           | (0.75-1.68)        |                   | (0.58-1.56)        |                   | (0.70-1.27)        |                   | (0.48-1.11)        |               |
| Coughing or sneezing in the elbow                                                         | 0.91               | 0.506             | 1.37               | 0.130             | 0.95               | 0.669             | 0.94               | 0.744         |
|                                                                                           | (0.69-1.20)        |                   | (0.91-2.05)        |                   | (0.75-1.20)        |                   | (0.66-1.34)        |               |
| <b>Using disposable handkerchiefs</b>                                                     | <b>1.40</b>        | <b>0.105*</b>     | 1.08               | 0.790             | 1.03               | 0.841             | 1.31               | 0.142         |
|                                                                                           | <b>(0.93-2.12)</b> |                   | (0.62-1.87)        |                   | (0.78-1.35)        |                   | (0.91-1.86)        |               |
| Wearing disposable masks                                                                  | 1.14               | 0.798             | 0.50               | 0.489             | 1.49               | 0.184             | 0.75               | 0.618         |
|                                                                                           | (0.41-3.17)        |                   | (0.07-3.61)        |                   | (0.83-2.68)        |                   | (0.23-2.37)        |               |
| Avoiding handshakes                                                                       | 0.95               | 0.807             | 0.88               | 0.611             | 0.92               | 0.593             | 0.91               | 0.673         |
|                                                                                           | (0.63-1.43)        |                   | (0.52-1.46)        |                   | (0.68-1.24)        |                   | (0.58-1.43)        |               |
| Stopped greeting people with hugs and/or kisses on both cheeks                            | 1.19               | 0.284             | 1.01               | 0.944             | 0.90               | 0.407             | 0.90               | 0.551         |
|                                                                                           | (0.87-1.63)        |                   | (0.68-1.51)        |                   | (0.71-1.15)        |                   | (0.63-1.28)        |               |
| <b>Limiting use of public transportation</b>                                              | 1.14               | 0.303             | 1.22               | 0.224             | <b>1.43</b>        | <b>&lt;0.001*</b> | 1.04               | 0.813         |
|                                                                                           | (0.88-1.47)        |                   | (0.88-1.69)        |                   | <b>(1.19-1.73)</b> |                   | (0.78-1.38)        |               |
| <b>Avoid places where many people gather</b>                                              | 1.12               | 0.380             | <b>1.30</b>        | <b>0.112*</b>     | 1.21               | 0.078             | 1.01               | 0.954         |
|                                                                                           | (0.87-1.43)        |                   | <b>(0.94-1.80)</b> |                   | (0.98-1.49)        |                   | (0.75-1.36)        |               |
| Staying home                                                                              | 1.17               | 0.247             | 1.46               | 0.022             | 1.41               | <0.001            | <b>1.28</b>        | <b>0.089*</b> |
|                                                                                           | (0.90-1.51)        |                   | (1.06-2.02)        |                   | (1.17-1.70)        |                   | <b>(0.96-1.70)</b> |               |
| Working from home                                                                         | 0.73               | 0.014             | 0.60               | 0.003             | 0.83               | 0.068             | 0.88               | 0.366         |
|                                                                                           | (0.57-0.94)        |                   | (0.42-0.83)        |                   | (0.70-1.01)        |                   | (0.66-1.17)        |               |
| Avoiding travels outside one's own country or region                                      | 1.10               | 0.432             | 0.94               | 0.711             | 1.11               | 0.301             | 0.99               | 0.947         |
|                                                                                           | (0.86-1.41)        |                   | (0.69-1.28)        |                   | (0.91-1.34)        |                   | (0.75-1.31)        |               |
| <b>Outcome: Restless legs during sleep</b>                                                |                    |                   |                    |                   |                    |                   |                    |               |
| Change in work situation                                                                  |                    |                   |                    |                   |                    |                   |                    |               |
| My work situation has not changed (reference)                                             | -                  | -                 | -                  | -                 | -                  | -                 | -                  | -             |
| I work/study from home                                                                    | 0.61               | 0.014             | 0.89               | 0.686             | 0.94               | 0.690             | 0.88               | 0.668         |
|                                                                                           | (0.14-8.05)        |                   | (0.49-1.59)        |                   | (0.69-1.28)        |                   | (0.50-1.57)        |               |
| I was sent home without being able to work                                                | 1.13               | 0.739             | 0.85               | 0.822             | 1.67               | 0.090             | 0.85               | 0.822         |
|                                                                                           | (0.54-2.37)        |                   | (0.20-3.56)        |                   | (0.92-3.03)        |                   | (0.20-3.56)        |               |
| I have taken a vacation or a leave of absence                                             | 1.07               | 0.944             | 3.25               | 0.255             | Too few            |                   | Too few            |               |
|                                                                                           | (0.14-8.05)        |                   | (0.43-24.9)        |                   |                    |                   |                    |               |
| I was let go                                                                              | Too few            |                   | 1.03               | 0.977             | 2.78               | 0.008             | 1.18               | 0.874         |
|                                                                                           |                    |                   | (0.14-7.62)        |                   | (1.30-5.94)        |                   | (0.16-8.73)        |               |
| I still go in to work, but my work situation has changed                                  | 1.23               | 0.263             | 1.40               | 0.259             | 1.07               | 0.682             | 1.16               | 0.611         |
|                                                                                           | (0.86-1.76)        |                   | (0.78-2.50)        |                   | (0.76-1.51)        |                   | (0.65-2.08)        |               |
| Occupation                                                                                |                    |                   |                    |                   |                    |                   |                    |               |
| Full time job (reference)                                                                 | -                  | -                 | -                  | -                 | -                  | -                 | -                  | -             |
| Part time job                                                                             | 0.87               | 0.788             | 1.09               | 0.906             | 1.01               | 0.969             | 1.29               | 0.423         |
|                                                                                           | (0.32-2.39)        |                   | (0.26-4.50)        |                   | (0.69-1.46)        |                   | (0.69-2.38)        |               |

## Supplementary material

|                                                                                                  |                                   |                   |                                   |                   |                                   |                   |                                   |                   |
|--------------------------------------------------------------------------------------------------|-----------------------------------|-------------------|-----------------------------------|-------------------|-----------------------------------|-------------------|-----------------------------------|-------------------|
| Self employed                                                                                    | 1.52<br>(0.90-2.59)               | 0.119             | 1.41<br>(0.61-3.29)               | 0.425             | 0.49<br>(0.18-1.32)               | 0.158             | 2.48<br>(1.05-5.87)               | 0.039             |
| Student                                                                                          | 1.11<br>(0.58-2.10)               | 0.755             | 0.71<br>(0.20-2.47)               | 0.589             | 1.42<br>(0.91-2.22)               | 0.123             | 0.84<br>(0.30-2.35)               | 0.733             |
| Stay-at-home by choice                                                                           | Too few                           |                   | Too few                           |                   | 1.85<br>(0.66-5.22)               | 0.244             | Too few                           |                   |
| Unemployed                                                                                       | 0.74<br>(0.23-2.35)               | 0.605             | 1.26<br>(0.30-5.25)               | 0.751             | 0.96<br>(0.42-2.22)               | 0.931             | 2.34<br>(0.83-6.59)               | 0.109             |
| Long-term sick leave/parental leave                                                              | 2.66<br>(0.62-11.5)               | 0.191             | Too few                           |                   | 1.95<br>(0.83-4.57)               | 0.125             | Too few                           |                   |
| Retired                                                                                          | 0.86<br>(0.42-1.77)               | 0.679             | 0.88<br>(0.30-2.60)               | 0.814             | 1.77<br>(1.13-2.76)               | 0.012             | 0.68<br>(0.23-2.02)               | 0.491             |
| Other                                                                                            | 1.81<br>(0.55-5.92)               | 0.326             | 1.47<br>(0.20-10.9)               | 0.707             | 1.21<br>(0.55-2.66)               | 0.630             | 2.28<br>(0.80-6.52)               | 0.123             |
| Job type                                                                                         |                                   |                   |                                   |                   |                                   |                   |                                   |                   |
| Academic (reference)                                                                             | -                                 | -                 | -                                 | -                 | -                                 | -                 | -                                 | -                 |
| <b>Administration/Office work</b>                                                                | 1.26<br>(0.84-1.91)               | 0.262             | 0.88<br>(0.43-1.82)               | 0.734             | <b>0.96</b><br><b>(0.69-1.35)</b> | <b>0.829</b>      | 2.19<br>(1.20-3.99)               | 0.011             |
| Sales/Service                                                                                    | 1.09<br>(0.57-2.09)               | 0.801             | 1.76<br>(0.75-4.14)               | 0.195             | 1.46<br>(0.85-2.50)               | 0.166             | 2.98<br>(1.22-7.26)               | 0.016             |
| Skilled worker                                                                                   | 1.53<br>(1.02-2.31)               | 0.042             | 2.32<br>(1.30-4.16)               | 0.005             | 1.83<br>(1.11-3.01)               | 0.017             | 0.81<br>(0.19-3.57)               | 0.790             |
| <b>Unskilled worker</b>                                                                          | 2.55<br>(1.39-4.68)               | 0.002             | 0.92<br>(0.21-3.94)               | 0.908             | 1.48<br>(0.77-2.84)               | 0.239             | <b>3.75</b><br><b>(1.45-9.70)</b> | <b>0.006*</b>     |
| Other                                                                                            | 1.78<br>(1.08-2.93)               | 0.023             | 1.17<br>(0.47-2.90)               | 0.742             | 1.56<br>(1.05-2.33)               | 0.029             | 2.29<br>(1.08-4.85)               | 0.031             |
| <b>Stamina score (continuous)</b>                                                                | <b>0.95</b><br><b>(0.93-0.97)</b> | <b>&lt;0.001*</b> | <b>0.96</b><br><b>(0.92-0.99)</b> | <b>0.022*</b>     | <b>0.94</b><br><b>(0.93-0.96)</b> | <b>&lt;0.001*</b> | <b>0.93</b><br><b>(0.90-0.96)</b> | <b>&lt;0.001*</b> |
| Ever been prescribed anti-depressive medication                                                  | 1.19<br>(0.70-2.00)               | 0.516             | 1.53<br>(0.73-3.20)               | 0.262             | 1.85<br>(1.37-2.50)               | <0.001            | 1.42<br>(0.79-2.59)               | 0.241             |
| Living with child(ren)                                                                           |                                   |                   |                                   |                   |                                   |                   |                                   |                   |
| No (reference)                                                                                   | -                                 | -                 | -                                 | -                 | -                                 | -                 | -                                 | -                 |
| Below school age (<5 years old)                                                                  | 0.34<br>(0.05-2.51)               | 0.291             | 2.18<br>(0.49-9.68)               | 0.304             | 0.40<br>(0.05-2.89)               | 0.362             | Too few                           |                   |
| School age (5 – 18 years old)                                                                    | 1.12<br>(0.82-1.54)               | 0.469             | 1.24<br>(0.74-2.09)               | 0.411             | 0.79<br>(0.62-1.01)               | 0.062             | 0.82<br>(0.53-1.29)               | 0.395             |
| Living with another adult (yes vs. no)                                                           | 1.19<br>(0.85-1.66)               | 0.313             | 0.94<br>(0.57-1.55)               | 0.810             | 1.02<br>(0.79-1.32)               | 0.855             | 1.01<br>(0.63-1.63)               | 0.959             |
| Educational level                                                                                |                                   |                   |                                   |                   |                                   |                   |                                   |                   |
| Elementary school (reference)                                                                    | -                                 | -                 | -                                 | -                 | -                                 | -                 | -                                 | -                 |
| High school or vocational course                                                                 | 0.99<br>(0.59-1.65)               | 0.956             | 0.68<br>(0.34-1.31)               | 0.239             | 0.58<br>(0.41-0.82)               | 0.002             | 0.96<br>(0.46-2.00)               | 0.922             |
| Short length education                                                                           | 0.96<br>(0.50-1.84)               | 0.903             | 0.39<br>(0.13-1.12)               | 0.081             | 0.63<br>(0.37-1.06)               | 0.082             | 1.34<br>(0.53-3.43)               | 0.536             |
| Medium length education                                                                          | 0.75<br>(0.42-1.37)               | 0.353             | 0.53<br>(0.24-1.20)               | 0.127             | 0.43<br>(0.29-0.63)               | <0.001            | 0.51<br>(0.22-1.19)               | 0.121             |
| <b>Long length education</b>                                                                     | 0.50<br>(0.26-0.98)               | 0.042             | 0.23<br>(0.08-0.66)               | 0.006             | <b>0.23</b><br><b>(0.13-0.42)</b> | <b>&lt;0.001*</b> | 0.53<br>(0.19-1.50)               | 0.229             |
| <b>Feeling worried about the COVID pandemic and cut-off from social experiences (yes vs. no)</b> | 0.68<br>(0.42-1.09)               | 0.106             | 0.50<br>(0.21-1.14)               | 0.100             | 0.79<br>(0.53-1.19)               | 0.257             | <b>1.92</b><br><b>(1.11-3.31)</b> | <b>0.019*</b>     |
| Daily alcohol intake during the pandemic (yes vs. no)                                            | 1.33<br>(0.69-2.59)               | 0.395             | 0.64<br>(0.15-2.65)               | 0.535             | 0.97<br>(0.47-2.03)               | 0.943             | 1.18<br>(0.36-3.86)               | 0.779             |
| Smoking during the pandemic (yes vs. no)                                                         | 1.19<br>(0.77-1.84)               | 0.426             | 1.15<br>(0.57-2.32)               | 0.692             | 1.56<br>(1.13-2.14)               | 0.007             | 0.75<br>(0.34-1.63)               | 0.467             |
| <b>BMI during the pandemic (continuous)</b>                                                      | <b>1.04</b><br><b>(1.00-1.08)</b> | <b>0.038*</b>     | <b>1.11</b><br><b>(1.05-1.17)</b> | <b>&lt;0.001*</b> | <b>1.05</b><br><b>(1.03-1.08)</b> | <b>&lt;0.001*</b> | <b>1.06</b><br><b>(1.02-1.11)</b> | <b>0.002*</b>     |
| Specific COVID-precautions (yes vs. no)                                                          |                                   |                   |                                   |                   |                                   |                   |                                   |                   |
| Frequently washing hands                                                                         | 1.02<br>(0.64-1.62)               | 0.931             | 0.78<br>(0.40-1.53)               | 0.477             | 1.11<br>(0.73-1.70)               | 0.622             | 1.57<br>(0.63-3.90)               | 0.329             |
| Coughing or sneezing in the elbow                                                                | 0.96<br>(0.69-1.34)               | 0.824             | 0.93<br>(0.55-1.56)               | 0.784             | 0.84<br>(0.63-1.23)               | 0.245             | 0.93<br>(0.53-1.64)               | 0.807             |
| Using disposable handkerchiefs                                                                   | 0.67<br>(0.38-1.20)               | 0.181             | 1.38<br>(0.69-2.72)               | 0.361             | 1.29<br>(0.97-1.71)               | 0.079             | 1.25<br>(0.75-2.08)               | 0.398             |
| Wearing disposable masks                                                                         | Too few                           |                   | 1.01<br>(0.14-7.38)               | 0.991             | 1.66<br>(0.86-3.20)               | 0.131             | 0.57<br>(0.08-4.12)               | 0.576             |
| Avoiding handshakes                                                                              | 0.89<br>(0.56-1.41)               | 0.608             | 0.89<br>(0.42-1.85)               | 0.746             | 0.62<br>(0.44-0.88)               | 0.008             | 1.14<br>(0.49-2.64)               | 0.755             |
| Stopped greeting people with hugs and/or kisses on both cheeks                                   | 0.80<br>(0.57-1.12)               | 0.192             | 0.79<br>(0.46-1.35)               | 0.389             | 0.82<br>(0.60-1.11)               | 0.203             | 1.62<br>(0.78-3.40)               | 0.195             |
| Limiting use of public transportation                                                            | 0.92<br>(0.68-1.25)               | 0.612             | 0.93<br>(0.58-1.50)               | 0.767             | 0.84<br>(0.66-1.08)               | 0.172             | 1.25<br>(0.81-1.93)               | 0.317             |
| Avoid places where many people gather                                                            | 0.82<br>(0.62-1.08)               | 0.167             | 0.99<br>(0.64-1.54)               | 0.968             | 0.89<br>(0.70-1.14)               | 0.351             | 0.97<br>(0.61-1.54)               | 0.904             |
| Staying home                                                                                     | 0.88<br>(0.64-1.21)               | 0.440             | 0.10<br>(0.75-1.93)               | 0.444             | 1.09<br>(0.85-1.39)               | 0.488             | 0.96<br>(0.61-1.52)               | 0.846             |

## Supplementary material

|                                                      |                            |              |                            |              |                            |              |                            |              |
|------------------------------------------------------|----------------------------|--------------|----------------------------|--------------|----------------------------|--------------|----------------------------|--------------|
| Working from home more often                         | <b>0.67</b><br>(0.50-0.91) | <b>0.009</b> | <b>0.70</b><br>(0.44-1.11) | <b>0.128</b> | <b>0.66</b><br>(0.51-0.86) | <b>0.002</b> | <b>0.96</b><br>(0.61-1.51) | <b>0.860</b> |
| Avoiding travels outside one's own country or region | <b>0.86</b><br>(0.66-1.14) | <b>0.293</b> | <b>0.93</b><br>(0.60-1.43) | <b>0.731</b> | <b>1.03</b><br>(0.81-1.30) | <b>0.826</b> | <b>0.96</b><br>(0.62-1.49) | <b>0.864</b> |

Factors with a P-value<0.05 are marked in bold writing

## Factors associated with health-related quality of life scores, stress levels, and quality of sleep measured during the COVID-19 pandemic

Multivariable linear regression analyses comprising all the variables that were displayed in Table 1 in the main manuscript were conducted to identify factors that affected MCS, PCS, stress score and quality of sleep during the COVID-19 pandemic (i.e. not the change in these outcomes). Moreover, multivariable logistic regression analyses comprising the same covariates were conducted to identify factors impacting quality of sleep during the pandemic. Factors affecting changes in scores (from before the pandemic to during) were displayed in the main manuscript.

**Table S5.** Linear regression analyses. Identification of characteristics associated with physical and mental health characteristics measured during the COVID-19 pandemic

|                                                          | Men (N =12,150)         |        | Women (N =14,303)       |        |
|----------------------------------------------------------|-------------------------|--------|-------------------------|--------|
|                                                          | Coef. (95% CI)          | P      | Coef. (95% CI)          | P      |
| Outcome: Mental component score                          |                         |        |                         |        |
| Age (continuous)                                         | 0.087 (0.075-0.099)     | <0.001 | 0.097 (0.084-0.111)     | <0.001 |
| Change in work situation                                 |                         |        |                         |        |
| My work situation has not changed (reference)            |                         |        |                         |        |
| I work/study from home                                   | -0.784 (-1.123- -0.444) | <0.001 | -0.369 (-0.730- -0.008) | 0.045  |
| I was let go                                             | -2.980 (-4.113- -1.848) | <0.001 | -3.712 (-5.00- -2.421)  | <0.001 |
| I still go in to work, but my work situation has changed | -0.549 (-0.899- -0.199) | 0.002  |                         |        |
| Occupation                                               |                         |        |                         |        |
| Full time job (reference)                                |                         |        |                         |        |
| Part time job                                            |                         |        |                         |        |
| Self employed                                            | -0.609 (-1.138- -0.079) | 0.024  |                         |        |
| Stamina score                                            | 0.411 (0.385-0.437)     | <0.001 | 0.421 (0.394-0.448)     | <0.001 |
| Ever been prescribed anti-depressive medication          | -1.268 (-1.777- -0.757) | <0.001 | -1.242 (-1.679- -0.806) | <0.001 |
| Living with child(ren)                                   |                         |        |                         |        |
| No (reference)                                           |                         |        |                         |        |
| Below school age (<5 years old)                          |                         |        |                         |        |

## Supplementary material

|                                                          |                         |        |                         |        |
|----------------------------------------------------------|-------------------------|--------|-------------------------|--------|
| School age (5 – 18 years old)                            | 0.405 (0.089-0.722)     | 0.012  |                         |        |
| Living with another adult (yes vs. no)                   |                         |        | 0.608 (0.294-0.923)     | <0.001 |
| Smoking during the pandemic (yes vs. no)                 | -0.743 (-1.175- -0.311) | 0.001  | -0.917 (-1.368- -0.466) | <0.001 |
| BMI during the pandemic (continuous)                     | -0.050 (-0.080- -0.015) | 0.006  |                         |        |
| Outcome: Physical component score                        |                         |        |                         |        |
| Age (continuous)                                         | -0.054 (-0.063- -0.045) | <0.001 | -0.048 (-0.058- -0.038) | <0.001 |
| Change in work situation                                 |                         |        |                         |        |
| I still go in to work, but my work situation has changed | -0.500 (-0.766- -0.235) | <0.001 |                         |        |
| Occupation                                               |                         |        |                         |        |
| Full time job (reference)                                |                         |        |                         |        |
| Part time job                                            |                         |        | -0.726 (-1.001- -0.445) | <0.001 |
| Job type                                                 |                         |        |                         |        |
| Academic (reference)                                     |                         |        |                         |        |
| Sales/Service                                            | -0.542 (-0.986- -0.099) | 0.017  | -0.745 (-1.244- -0.247) | 0.003  |
| Skilled worker                                           | -1.053 (-1.389- -0.718) | <0.001 | -1.058 (-1.673- -0.444) | 0.001  |
| Unskilled worker                                         | -1.474 (-2.023- -0.924) | <0.001 | -0.650 (-1.024- -0.276) | 0.001  |
| Other                                                    |                         |        |                         |        |
| Stamina score                                            | 0.081 (0.061-0.100)     | <0.001 | 0.045 (0.026-0.065)     | <0.001 |
| Ever been prescribed anti-depressive medication          | -1.052 (-1.438- -0.665) | <0.001 | -0.911 (-1.229- -0.592) | <0.001 |
| Educational level                                        |                         |        |                         |        |
| Elementary school (reference)                            |                         |        |                         |        |
| Long length education                                    |                         |        | 0.562 (0.011-1.114)     | 0.046  |
| Smoking during the pandemic (yes vs. no)                 | -0.376 (-0.703- -0.048) | 0.025  |                         |        |
| BMI during the pandemic (continuous)                     | -0.191 (-0.218- -0.164) | <0.001 | -0.220 (-0.242- -0.199) | <0.001 |
| Outcome: Stress score                                    |                         |        |                         |        |
|                                                          | Men (N=5,790)           |        | Women (N=6,617)         |        |
| Age (continuous)                                         | -0.055 (-0.065- -0.046) | <0.001 | -0.072 (-0.082- -0.061) | <0.001 |
| Change in work situation                                 |                         |        |                         |        |
| My work situation has not changed (reference)            |                         |        |                         |        |
| I was let go                                             | 2.761 (1.851-3.669)     | <0.001 | 3.436 (2.443-4.428)     | <0.001 |
| I still go in to work, but my work situation has changed | 0.554 (0.273-0.835)     | <0.001 | 0.603 (0.325-0.883)     | <0.001 |
| Stamina score (continuous)                               | -0.491 (-0.512- -0.473) | <0.001 | -0.508 (-0.528- -0.487) | <0.001 |
| Occupation                                               |                         |        |                         |        |
| Full time job (reference)                                |                         |        |                         |        |
| Part time job                                            | 0.714 (0.149-1.278)     | 0.013  |                         |        |
| Self employed                                            | 0.455 (0.030-0.879)     | 0.036  |                         |        |
| Ever been prescribed anti-depressive medication          | 1.351 (0.942-1.761)     | <0.001 | 1.151 (0.816-1.486)     | <0.001 |

## Supplementary material

|                                          |                     |       |                         |       |
|------------------------------------------|---------------------|-------|-------------------------|-------|
| Living with child(ren)                   |                     |       |                         |       |
| No (reference)                           |                     |       |                         |       |
| School age (5 – 18 years old)            | 0.428 (0.174-0.682) | 0.001 |                         |       |
| Living with another adult (yes vs. no)   |                     |       | -0.338 (-0.508- -0.096) | 0.006 |
| Smoking during the pandemic (yes vs. no) | 0.518 (0.171-0.865) | 0.003 | 0.519 (0.172-0.866)     | 0.003 |
| BMI during the pandemic (continuous)     | 0.039 (0.011-0.068) | 0.007 | 0.040 (0.018-0.063)     | 0.001 |

\*The presented coefficients are those with a P-value<0.05 in the model comprising all covariates.



**Table S6.** Logistic regression analyses. Identification of characteristics associated with quality of sleep measured during the COVID-19 pandemic

|                                                 | Men (N =12,150)  |        | Women (N =14,303) |        |
|-------------------------------------------------|------------------|--------|-------------------|--------|
|                                                 | OR (95% CI)      | P      | OR (95% CI)       | P      |
| <b>Outcome: Insomnia (yes vs. no)</b>           |                  |        |                   |        |
| Age (continuous)                                | 1.02 (1.01-1.02) | <0.001 | 1.01 (1.01-1.02)  | <0.001 |
| Change in work situation                        |                  |        |                   |        |
| My work situation has not changed (reference)   |                  |        |                   |        |
| I was sent home without being able to work      |                  |        | 1.31 (1.02-1.70)  | 0.038  |
| Type of job                                     |                  |        |                   |        |
| Academic (reference)                            |                  |        |                   |        |
| Skilled worker                                  |                  |        | 1.33 (1.06-1.66)  | 0.014  |
| Stamina score                                   | 0.94 (0.93-0.95) | <0.001 | 0.95 (0.94-0.96)  | <0.001 |
| Ever been prescribed anti-depressive medication | 1.40 (1.16-1.69) | <0.001 | 1.37 (1.19-1.58)  | <0.001 |
| Living with child(ren)                          |                  |        |                   |        |
| No (reference)                                  |                  |        |                   |        |
| School age (5 – 18 years old)                   |                  |        | 0.85 (0.76-0.85)  | 0.005  |
| Living with another adult (yes vs. no)          | 0.86 (0.76-0.97) | 0.014  |                   |        |
| Educational level                               |                  |        |                   |        |
| Elementary school (reference)                   |                  |        |                   |        |
| High school or vocational course                |                  |        | 0.80 (0.65-0.98)  | 0.028  |
| Short length education                          |                  |        | 0.69 (0.53-0.90)  | 0.005  |
| Medium length education                         |                  |        | 0.72 (0.58-0.90)  | 0.004  |
| Long length education                           |                  |        | 0.71 (0.56-0.91)  | 0.008  |
| BMI during the pandemic (continuous)            | 1.02 (1.01-1.03) | 0.004  | 1.02 (1.01-1.03)  | <0.001 |
| <b>Outcome: Daytime fatigue (yes vs. no)</b>    |                  |        |                   |        |
| Age (continuous)                                | 0.99 (0.98-0.99) | 0.006  | 0.97 (0.96-0.99)  | <0.001 |
| Change in work situation                        |                  |        |                   |        |
| My work situation has not changed (reference)   |                  |        |                   |        |
| I was let go                                    | 2.26 (1.21-4.22) | 0.010  | 2.39 (1.42-4.04)  | 0.001  |
| Occupation                                      |                  |        |                   |        |
| Full time job (reference)                       |                  |        |                   |        |
| Part time job                                   | 1.86 (1.19-2.88) | 0.006  |                   |        |
| Stamina score                                   | 0.90 (0.89-0.92) | <0.001 | 0.91 (0.90-0.93)  | <0.001 |
| Ever been prescribed anti-depressive medication | 1.92 (1.43-2.57) | <0.001 | 1.84 (1.50-2.25)  | <0.001 |
| Educational level                               |                  |        |                   |        |
| Elementary school (reference)                   |                  |        |                   |        |
| Long length education                           |                  |        | 0.58 (0.38-0.89)  | 0.011  |

## Supplementary material

|                                                  |                  |        |                  |        |
|--------------------------------------------------|------------------|--------|------------------|--------|
| Smoking during the pandemic (yes vs. no)         | 1.49 (1.12-1.98) | 0.006  | 1.37 (1.09-1.72) | 0.006  |
| BMI during the pandemic (continuous)             | 1.07 (1.04-1.10) | <0.001 | 1.04 (1.02-1.05) | <0.001 |
| Outcome: Restless legs during sleep (yes vs. no) |                  |        |                  |        |
|                                                  | Men (N=5,790)    |        | Women (N=6,617)  |        |
| Age (continuous)                                 | 1.04 (1.00-1.02) | 0.005  | 1.03 (1.02-1.04) | <0.001 |
| Change in work situation                         |                  |        |                  |        |
| My work situation has not changed (reference)    |                  |        |                  |        |
| I was sent home without being able to work       | 1.59 (1.01-2.50) | 0.043  |                  |        |
| I was let go                                     |                  |        | 2.12 (1.19-3.78) | 0.011  |
| Stamina score (continuous)                       | 0.95 (0.94-0.97) | <0.001 | 0.95 (0.94-0.97) | <0.001 |
| Occupation                                       |                  |        |                  |        |
| Full time job (reference)                        |                  |        |                  |        |
| Part time job                                    |                  |        | 0.73 (0.57-0.93) | 0.011  |
| Ever been prescribed anti-depressive medication  | 1.83 (1.36-2.47) | <0.001 | 1.44 (1.15-1.81) | 0.002  |
| Living with another adult (yes vs. no)           | 1.44 (1.12-1.86) | 0.005  | 1.30 (1.07-1.58) | 0.008  |
| Educational level                                |                  |        |                  |        |
| Elementary school (reference)                    |                  |        |                  |        |
| Long length education                            |                  |        | 0.49 (0.31-0.76) | 0.002  |
| Smoking during the pandemic (yes vs. no)         |                  |        | 1.38 (1.08-1.77) | 0.011  |
| BMI during the pandemic (continuous)             | 1.06 (1.04-1.09) | <0.001 | 1.06 (1.05-1.08) | <0.001 |

\*The presented coefficients are those with a P-value<0.05 in the model comprising all covariates.
